# Supplementary material for: Site-specific functionalization with amino, guanidinium, and imidazolyl groups enabling the activation of 10–23 DNAzyme
Source: Royal Society of Chemistry journal article supplement (doi:10.1039/d0ra02226h), 2020-01-01
Supplement: d0ra02226h1.pdf [file d0ra02226h1.pdf]

Electronic Supplementary Material (ESI)

Site-specific functionalization with amino, guanidinium, and imidazolyl groups  
enabling activation of 10-23 DNAzyme

Shanshan Du,<sup>a</sup> Yang Li,<sup>a</sup> Zhilong Chai,<sup>b</sup> Weiguo Shi<sup>a</sup> and Junlin He<sup>\*a</sup>

*<sup>a</sup> State Key Laboratory of Toxicology and Medical Countermeasures, Beijing Institute of  
Pharmacology and Toxicology, Beijing 100850, China*

*<sup>b</sup> School of Pharmaceutical Sciences, Guizhou University, Guizhou 550025, China*

\*Corresponding author

---

### *T<sub>m</sub> measurement*

Equal molar DNAzyme and substrate D19 were mixed in the reaction buffer (50 mM Tris-HCl, pH 7.5, 2 mM Mg<sup>2+</sup>). On a Cary Bio100, the solution was heated at 85 °C for 10 min, followed by cooling at a rate of 1 °C/min, and the UV absorbance at 260 nm was recorded simultaneously. The A<sub>260</sub> versus temperature curve was derivatized to determine the T<sub>m</sub> values.

### *CD spectra*

Above solutions of DNAzyme-substrate in the reaction buffer (50 mM Tris-HCl, pH 7.5, 2 mM Mg<sup>2+</sup>) were used for CD spectra, on a MOS-450 spectropolarimeter (Biologic, France). At r.t., a sample in a 1 cm path length cuvette was scanned from 200 nm to 350 nm, and three scans were averaged and smoothed with a Savitzky–Golay filter.

Table S1 characterization of DNAzymes with ESI-MS

---

| DNAzyme   | Sequence                                             | MW (calc) | MW (found) |
|-----------|------------------------------------------------------|-----------|------------|
| DZ-A5-3   | 5'-d(tgc tct cca GGC T3G CTA CAA CGA cct gca cct)-3' | 10093.6   | 10094.3    |
| DZ-A9-3   | 5'-d(tgc tct cca GGC TAG CT3 CAA CGA cct gca cct)-3' | 10093.6   | 10094.6    |
| DZ-A11-3  | 5'-d(tgc tct cca GGC TAG CTA C3A CGA cct gca cct)-3' | 10093.6   | 10094.2    |
| DZ-A12-3  | 5'-d(tgc tct cca GGC TAG CTA CA3 CGA cct gca cct)-3' | 10093.6   | 10094.0    |
| DZ-A15-3  | 5'-d(tgc tct cca GGC TAG CTA CAA CG3 cct gca cct)-3' | 10093.6   | 10094.1    |
| DZ-A0-3   | 5'-d(tgc tct cc3 GGC TAG CTA CAA CGA cct gca cct)-3' | 10093.6   | 10094.0    |
| DZ-A5-4   | 5'-d(tgc tct cca GGC T4G CTA CAA CGA cct gca cct)-3' | 10123.6   | 10123.8    |
| DZ-A9-4   | 5'-d(tgc tct cca GGC TAG CT4 CAA CGA cct gca cct)-3' | 10123.6   | 10122.7    |
| DZ-A11-4  | 5'-d(tgc tct cca GGC TAG CTA C4A CGA cct gca cct)-3' | 10123.6   | 10123.5    |
| DZ-A 12-4 | 5'-d(tgc tct cca GGC TAG CTA CA4 CGA cct gca cct)-3' | 10123.6   | 10126.6    |
| DZ-A15-4  | 5'-d(tgc tct cca GGC TAG CTA CAA CG4 cct gca cct)-3' | 10123.6   | 10123.2    |
| DZ-A0-4   | 5'-d(tgc tct cc4 GGC TAG CTA CAA CGA cct gca cct)-3' | 10123.6   | 10123.4    |
| DZ-A5-5   | 5'-d(tgc tct cca GGC T5G CTA CAA CGA cct gca cct)-3' | 10093.0   | 10095.0    |
| DZ-A9-5   | 5'-d(tgc tct cca GGC TAG CT5 CAA CGA cct gca cct)-3' | 10093.0   | 10092.8    |
| DZ-A11-5  | 5'-d(tgc tct cca GGC TAG CTA C5A CGA cct gca cct)-3' | 10093.0   | 10091.7    |
| DZ-A 12-5 | 5'-d(tgc tct cca GGC TAG CTA CA5 CGA cct gca cct)-3' | 10093.0   | 10097.6    |
| DZ-A15-5  | 5'-d(tgc tct cca GGC TAG CTA CAA CG5 cct gca cct)-3' | 10093.0   | 10091.4    |

---

Table S1 (continued)

| DNAzyme   | Sequence                                                      | MW (calc) | MW (found) |
|-----------|---------------------------------------------------------------|-----------|------------|
| DZ-A0-5   | 5'-d(tgc tct cc <b>5</b> GGC TAG CTA CAA CGA cct gca cct)-3'  | 10093.0   | 10091.7    |
| DZ-A5-6   | 5'-d(tgc tct cca GGC T <b>6</b> G CTA CAA CGA cct gca cct)-3' | 10102.4   | 10102.4    |
| DZ-A9-6   | 5'-d(tgc tct cca GGC TAG CT <b>6</b> CAA CGA cct gca cct)-3'  | 10102.4   | 10102.4    |
| DZ-A11-6  | 5'-d(tgc tct cca GGC TAG CTA C <b>6</b> A CGA cct gca cct)-3' | 10102.4   | 10102.0    |
| DZ-A 12-6 | 5'-d(tgc tct cca GGC TAG CTA CA <b>6</b> CGA cct gca cct)-3'  | 10102.4   | 10102.1    |
| DZ-A15-6  | 5'-d(tgc tct cca GGC TAG CTA CAA CG <b>6</b> cct gca cct)-3'  | 10102.4   | 10102.0    |
| DZ-A0-6   | 5'-d(tgc tct cc <b>6</b> GGC TAG CTA CAA CGA cct gca cct)-3'  | 10102.4   | 10103.1    |
| DZ-A5-7   | 5'-d(tgc tct cca GGC T <b>7</b> G CTA CAA CGA cct gca cct)-3' | 10066.0   | 10066.6    |
| DZ-A9-7   | 5'-d(tgc tct cca GGC TAG CT <b>7</b> CAA CGA cct gca cct)-3'  | 10066.0   | 10067.3    |
| DZ-A11-7  | 5'-d(tgc tct cca GGC TAG CTA C <b>7</b> A CGA cct gca cct)-3' | 10066.0   | 10066.3    |
| DZ-A 12-7 | 5'-d(tgc tct cca GGC TAG CTA CA <b>7</b> CGA cct gca cct)-3'  | 10066.0   | 10066.5    |
| DZ-A15-7  | 5'-d(tgc tct cca GGC TAG CTA CAA CG <b>7</b> cct gca cct)-3'  | 10066.0   | 10066.2    |
| DZ-A0-7   | 5'-d(tgc tct cc <b>7</b> GGC TAG CTA CAA CGA cct gca cct)-3'  | 10066.0   | 10066.5    |
| DZ-A5-8   | 5'-d(tgc tct cca GGC T <b>8</b> G CTA CAA CGA cct gca cct)-3' | 10102.7   | 10103.2    |
| DZ-A9-8   | 5'-d(tgc tct cca GGC TAG CT <b>8</b> CAA CGA cct gca cct)-3'  | 10102.7   | 10102.5    |
| DZ-A11-8  | 5'-d(tgc tct cca GGC TAG CTA C <b>8</b> A CGA cct gca cct)-3' | 10102.7   | 10104.0    |
| DZ-A12-8  | 5'-d(tgc tct cca GGC TAG CTA CA <b>8</b> CGA cct gca cct)-3'  | 10102.7   | 10102.4    |
| DZ-A15-8  | 5'-d(tgc tct cca GGC TAG CTA CAA CG <b>8</b> cct gca cct)-3'  | 10102.7   | 10102.4    |
| DZ-A0-8   | 5'-d(tgc tct cc <b>8</b> GGC TAG CTA CAA CGA cct gca cct)-3'  | 10102.7   | 10105.1    |
| DZ-A5-9   | 5'-d(tgc tct cca GGC T <b>9</b> G CTA CAA CGA cct gca cct)-3' | 10093.0   | 10092.2    |
| DZ-A9-9   | 5'-d(tgc tct cca GGC TAG CT <b>9</b> CAA CGA cct gca cct)-3'  | 10093.0   | 10091.8    |
| DZ-A11-9  | 5'-d(tgc tct cca GGC TAG CTA C <b>9</b> A CGA cct gca cct)-3' | 10093.0   | 10091.2    |
| DZ-A12-9  | 5'-d(tgc tct cca GGC TAG CTA CA <b>9</b> CGA cct gca cct)-3'  | 10093.0   | 10094.6    |
| DZ-A15-9  | 5'-d(tgc tct cca GGC TAG CTA CAA CG <b>9</b> cct gca cct)-3'  | 10093.0   | 10091.4    |
| DZ-A0-9   | 5'-d(tgc tct cc <b>9</b> GGC TAG CTA CAA CGA cct gca cct)-3'  | 10093.0   | 10093.2    |

Table S2  $T_m$  of modified DNAzymes with its complementary DNA substrate<sup>a</sup>

| DNAzyme  | $T_m$ (°C) | DNAzyme  | $T_m$ (°C) | DNAzyme  | $T_m$ (°C) |
|----------|------------|----------|------------|----------|------------|
| DZ01     | 50.2       |          |            |          |            |
| DZ-A0-3  | 51.6       | DZ-A0-4  | 48.7       | DZ-A0-5  | 51.0       |
| DZ-A5-3  | 51.8       | DZ-A5-4  | 50.6       | DZ-A5-5  | 49.8       |
| DZ-A9-3  | 52.2       | DZ-A9-4  | 50.9       | DZ-A9-5  | 50.7       |
| DZ-A11-3 | 51.6       | DZ-A11-4 | 50.0       | DZ-A11-5 | 50.3       |
| DZ-A12-3 | 52.3       | DZ-A12-4 | 50.2       | DZ-A12-5 | 50.3       |
| DZ-A15-3 | 52.5       | DZ-A15-4 | 50.3       | DZ-A15-5 | 50.3       |
| DZ-A0-6  | 48.8       | DZ-A0-7  | 51.1       | DZ-A0-8  | 48.6       |
| DZ-A5-6  | 49.5       | DZ-A5-7  | 50.4       | DZ-A5-8  | 49.4       |
| DZ-A9-6  | 49.8       | DZ-A9-7  | 49.1       | DZ-A9-8  | 49.7       |
| DZ-A11-6 | 50.1       | DZ-A11-7 | 49.2       | DZ-A11-8 | 50.1       |
| DZ-A12-6 | 50.2       | DZ-A12-7 | 50.1       | DZ-A12-8 | 50.0       |
| DZ-A15-6 | 50.6       | DZ-A15-7 | 52.3       | DZ-A15-8 | 49.5       |
| DZ-A0-9  | 49.8       | DZ-A5-9  | 50.8       | DZ-A9-9  | 51.0       |
| DZ-A11-9 | 50.0       | DZ-A12-9 | 50.9       | Z-A15-9  | 49.7       |

<sup>a</sup>Measured under the reaction conditions (50 mM Tris-HCl, pH 7.5, 2 mM Mg<sup>2+</sup>).

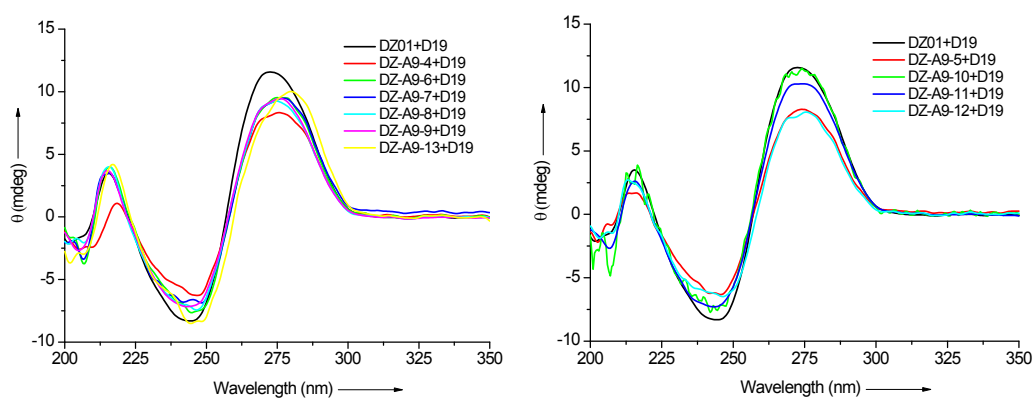

Fig. S1 CD spectra of DNAzymes with the full-DNA substrate under the reaction conditions (50 mM Tris-HCl, pH 7.5, 2 mM Mg<sup>2+</sup>)

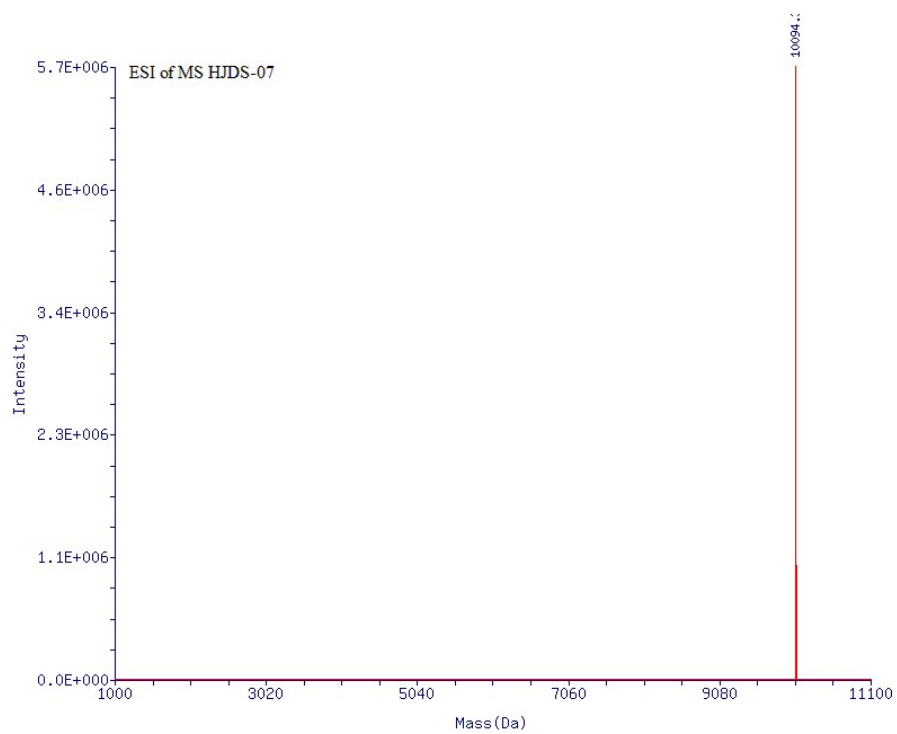

DZ-A5-3

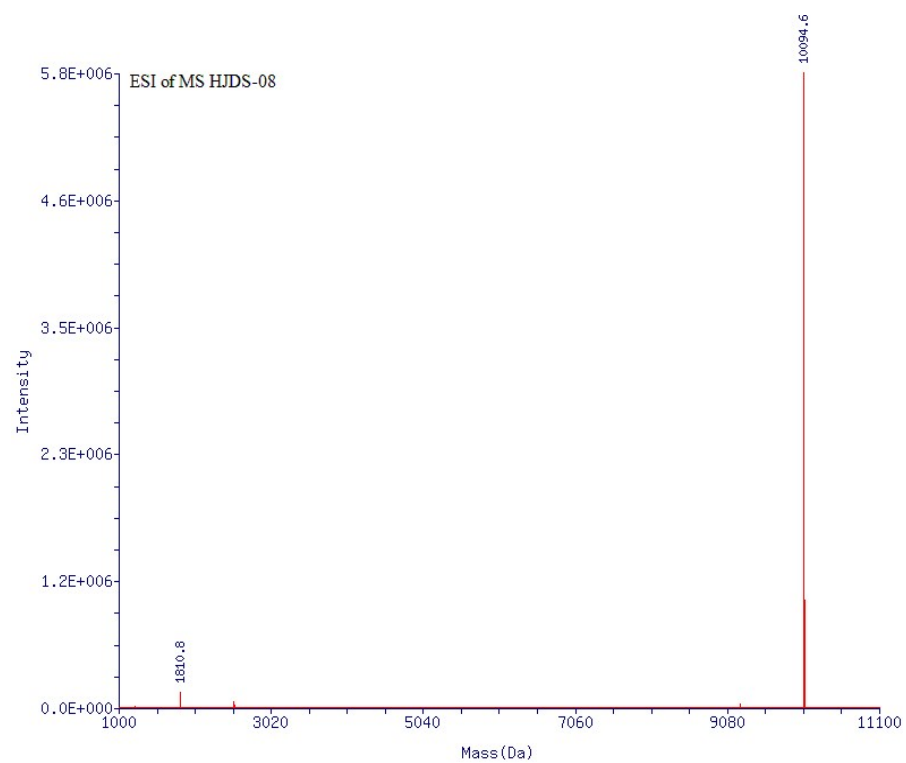

DZ-A9-3

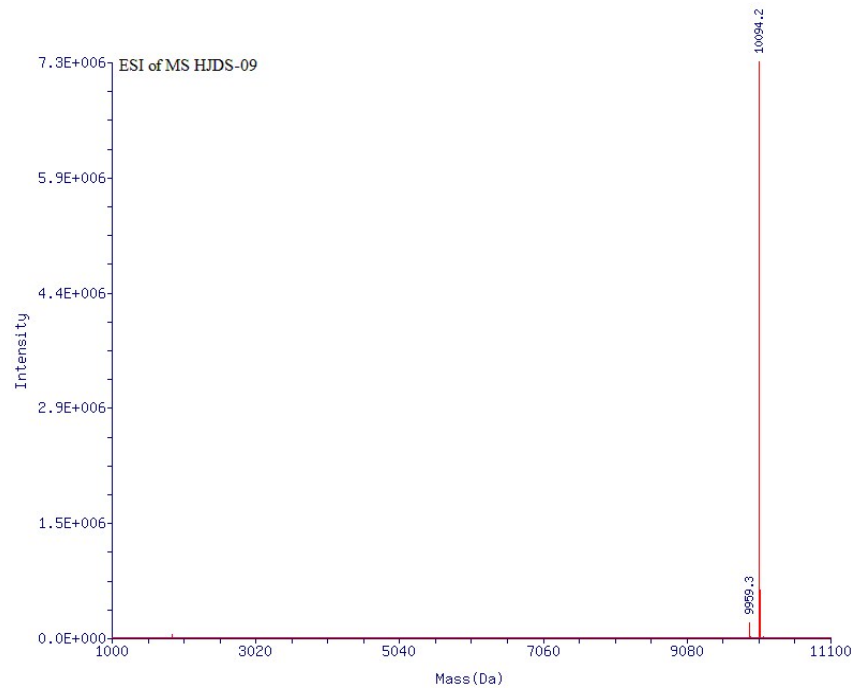

DZ-A11-3

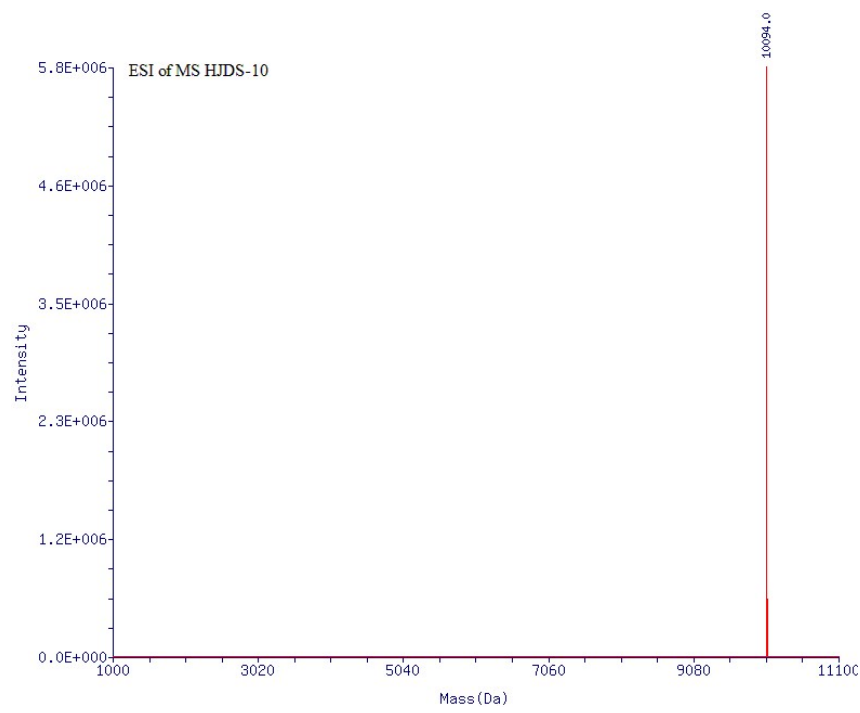

DZ-A12-3

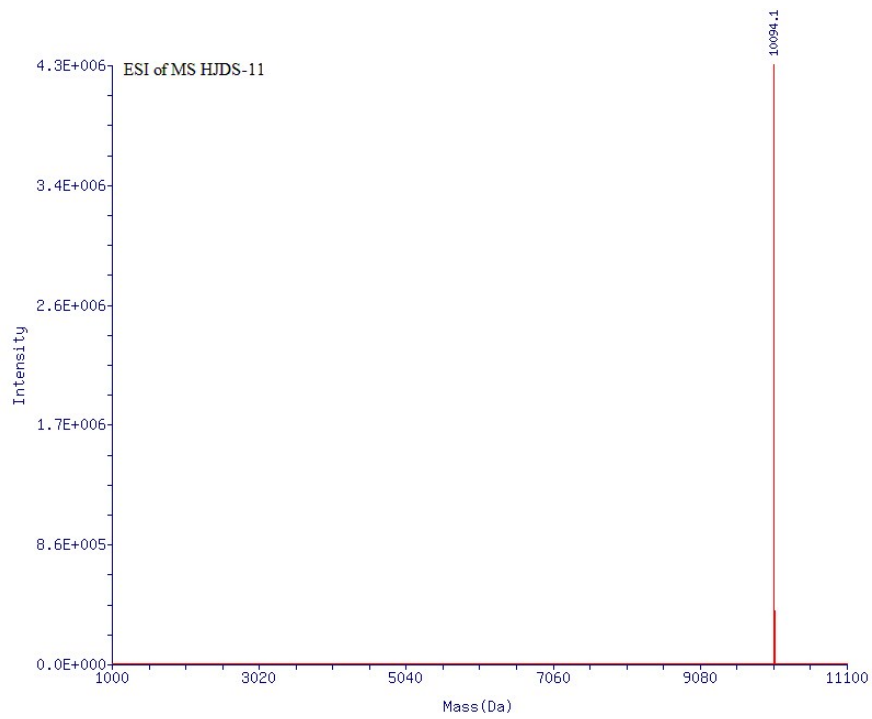

DZ-A15-3

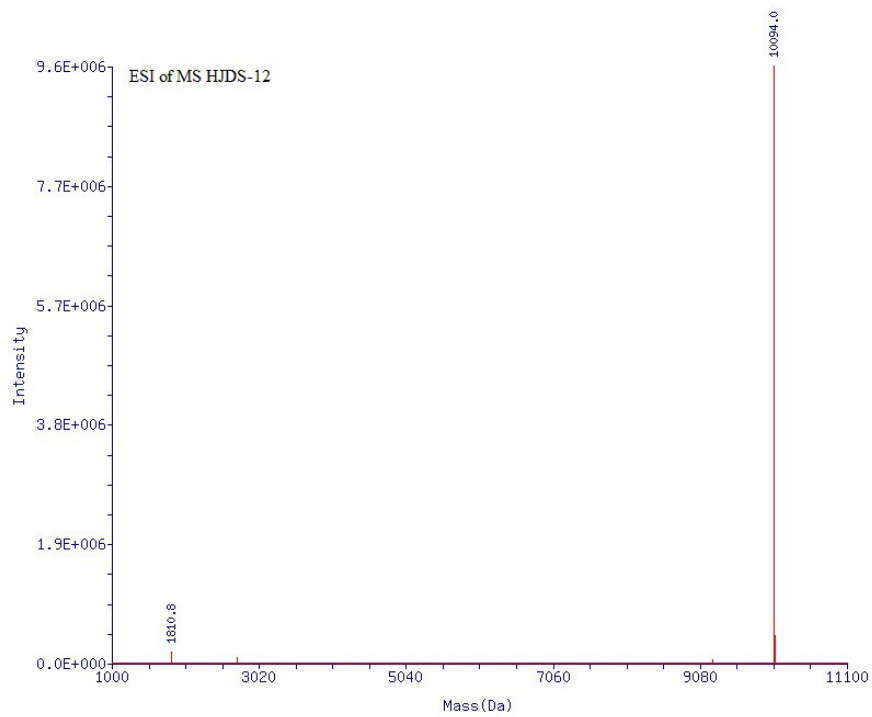

DZ-A0-3

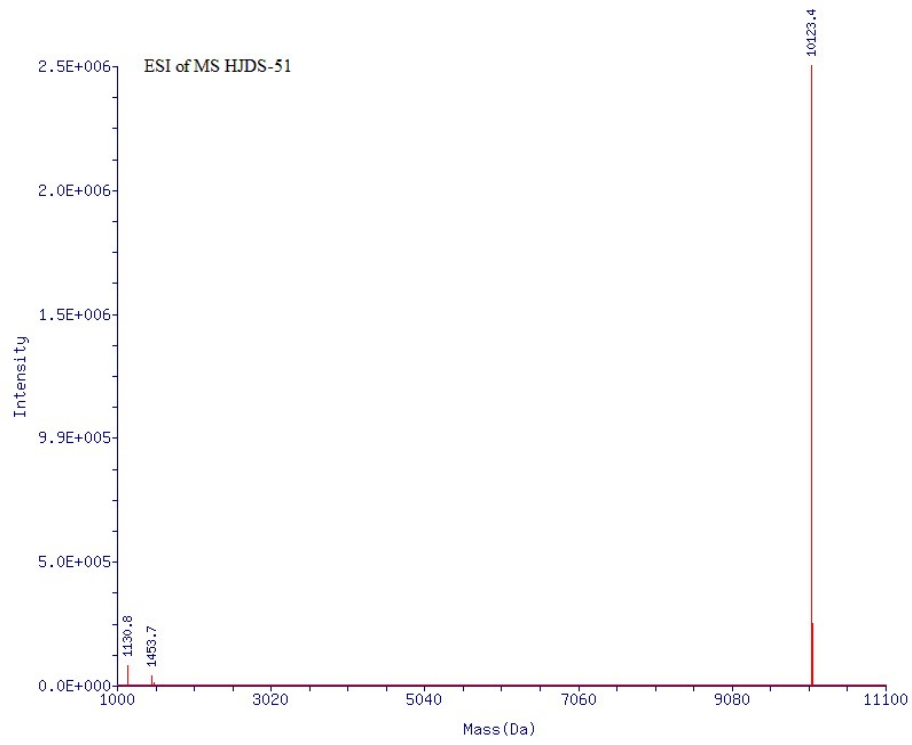

DZ-A5-4

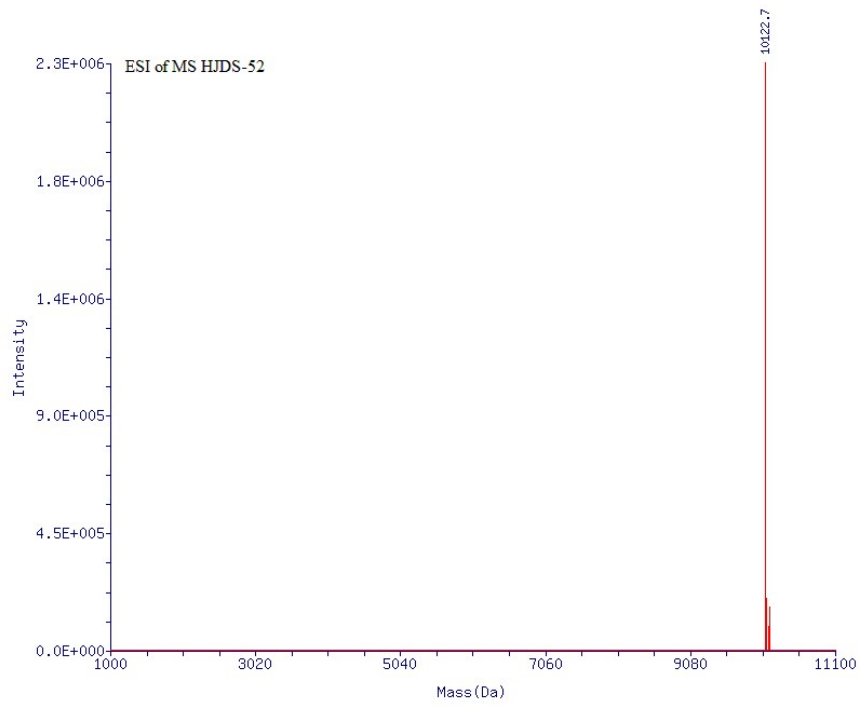

DZ-A9-4



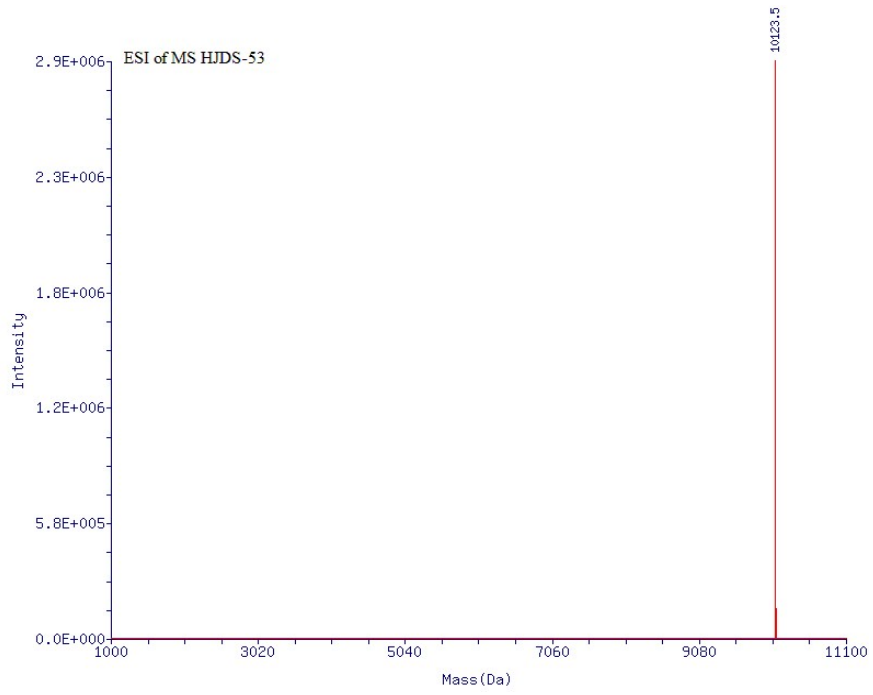

DZ-A11-4

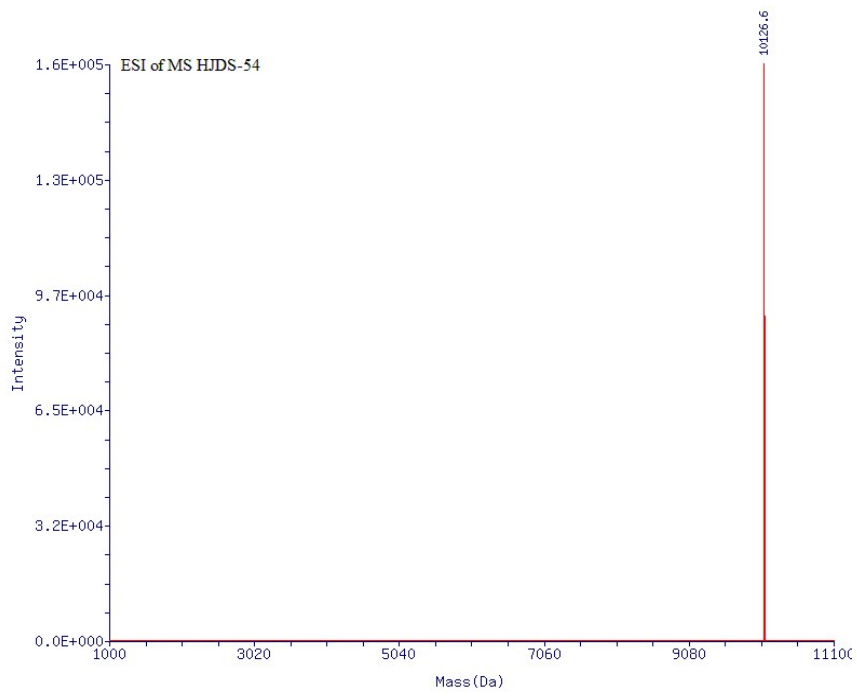

DZ-A12-4

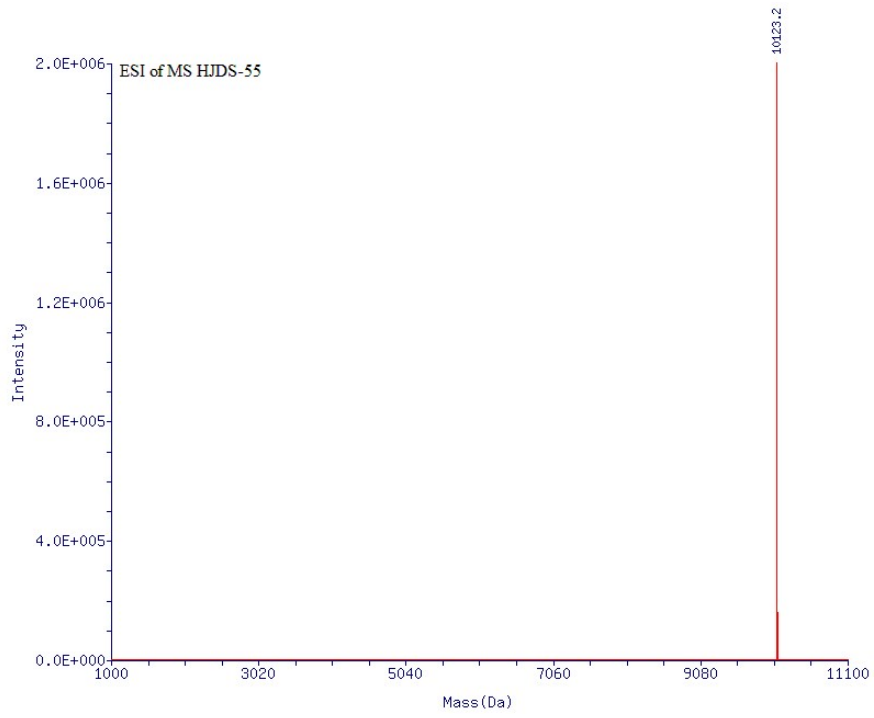

DZ-A15-4

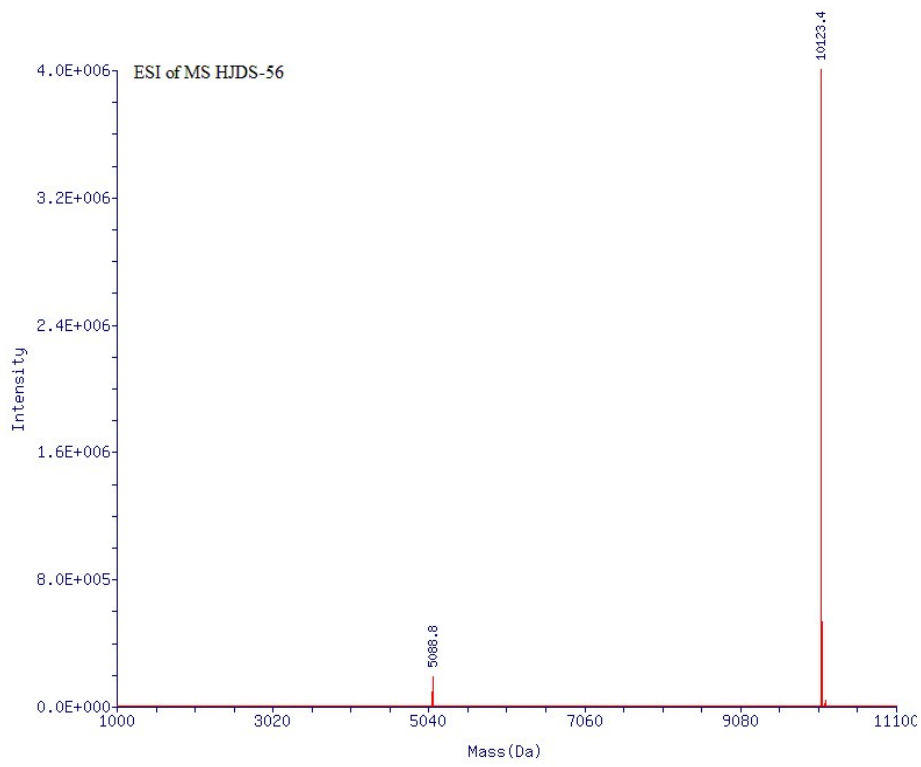

DZ-A0-4

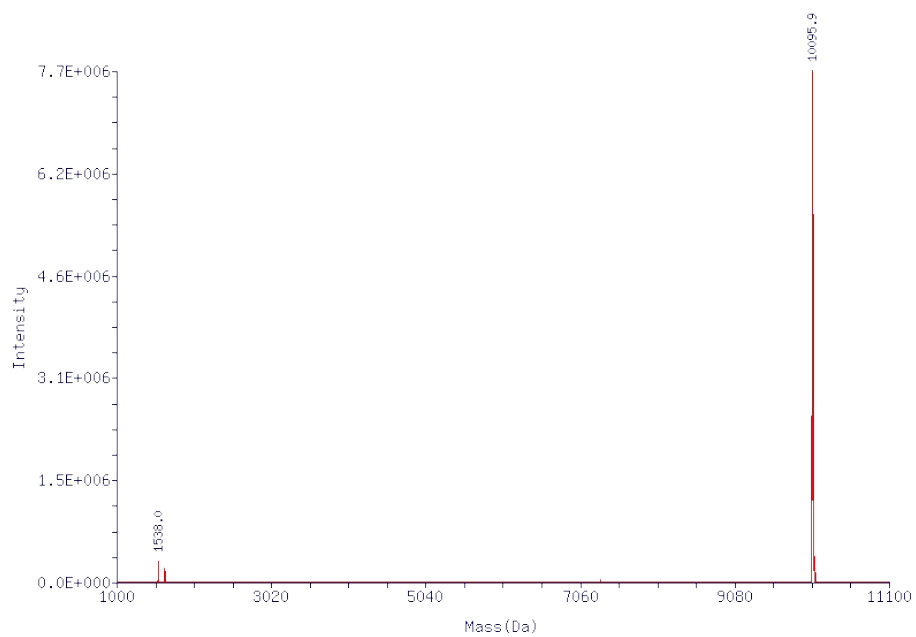

DZ-A5-5

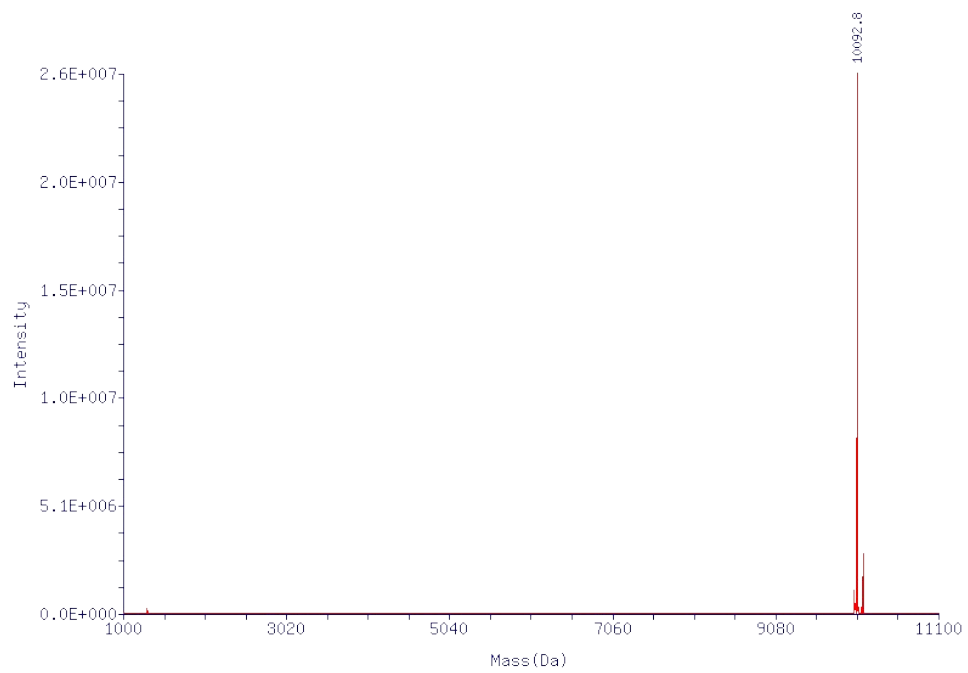

DZ-

A9-5

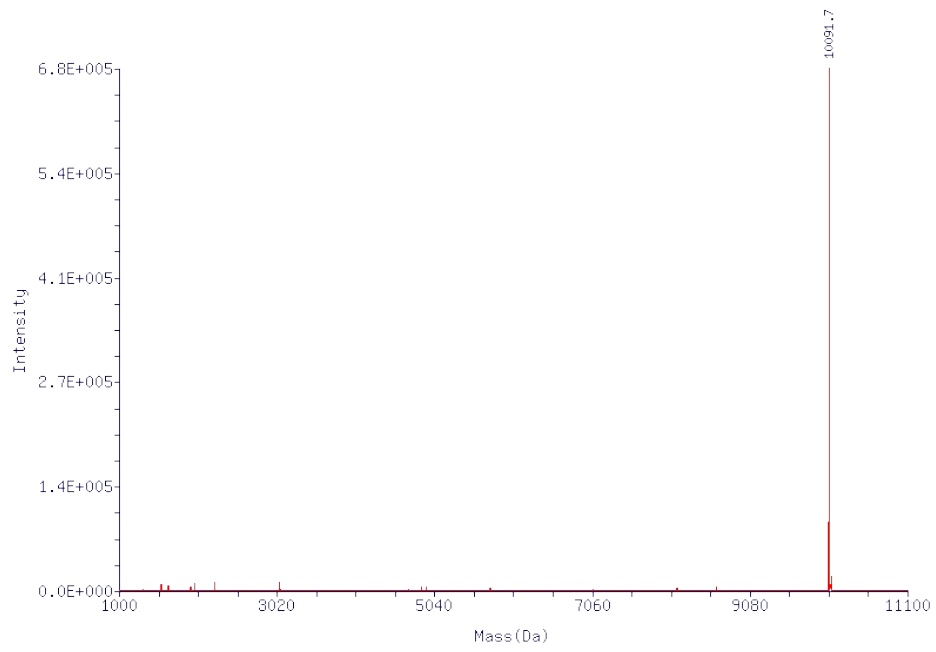

DZ-A11-

5

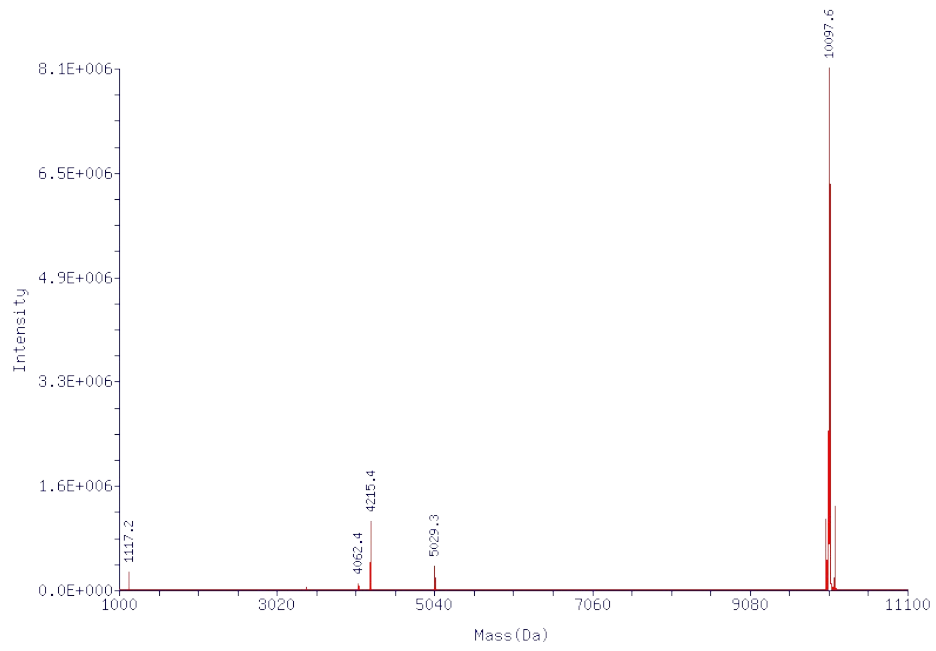

DZ-A12-

5

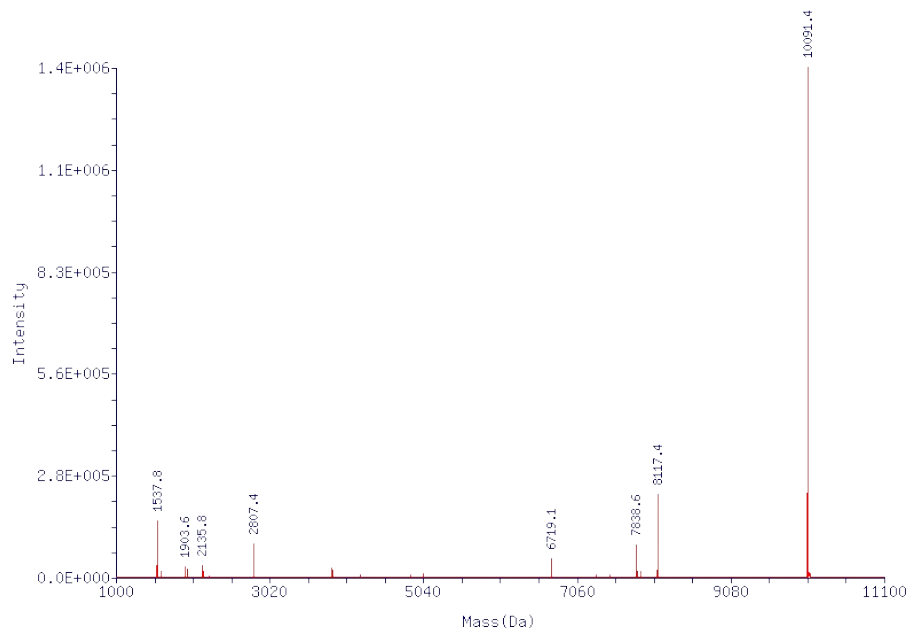

DZ-A15-5

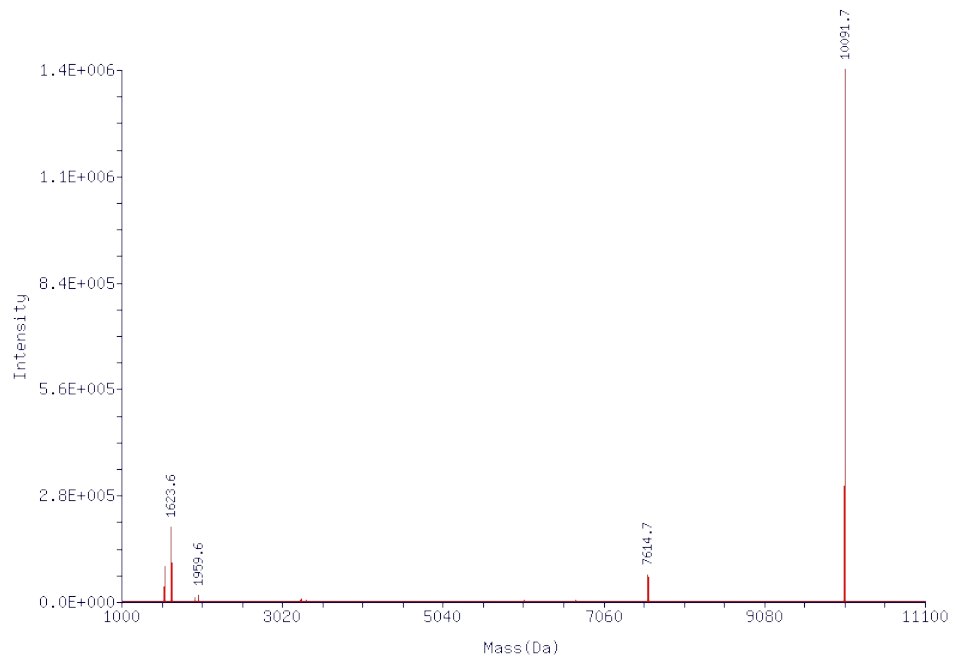

DZ-A0-

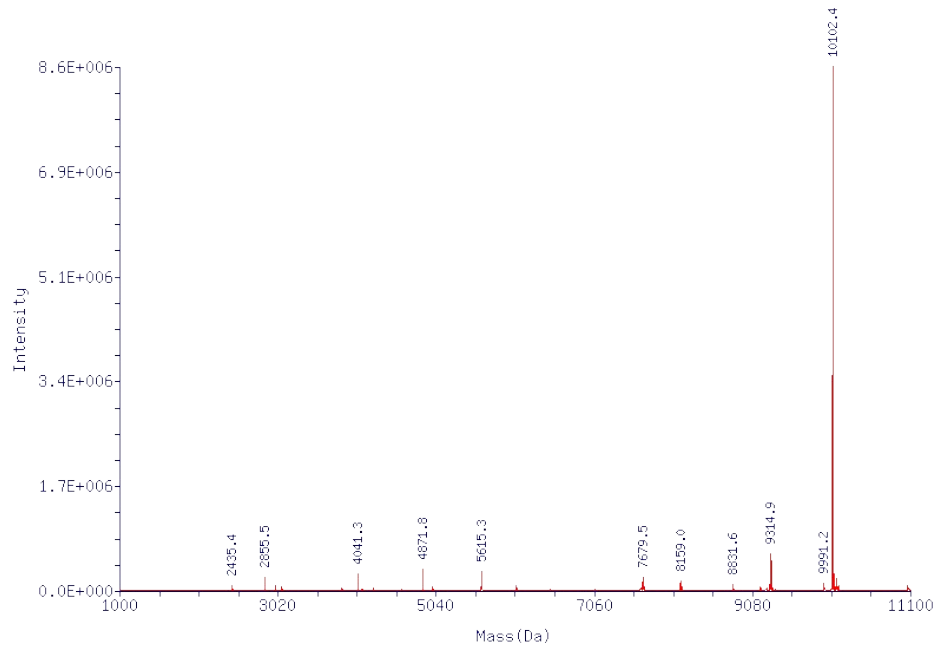

DZ-A5-6

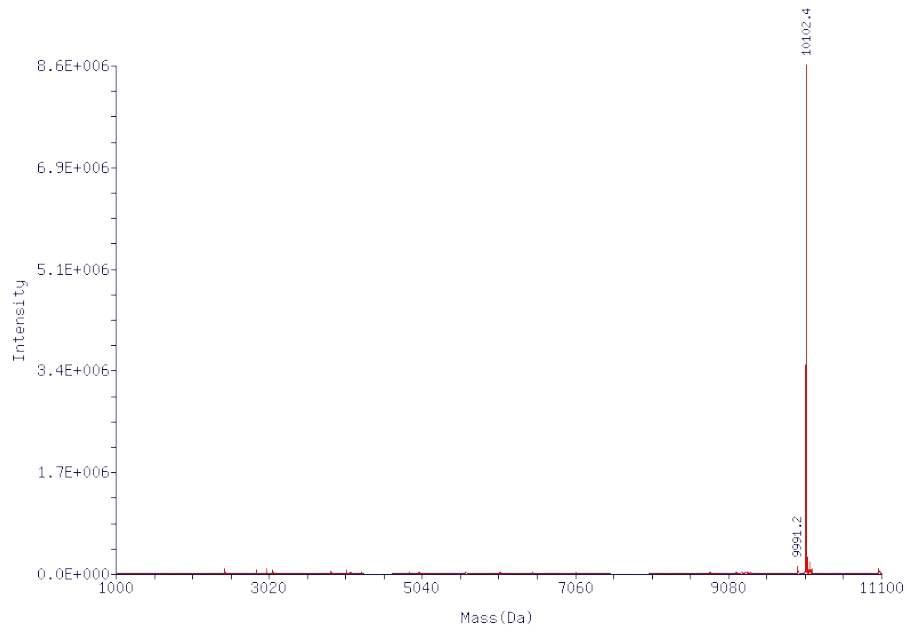

DZ-A9-6

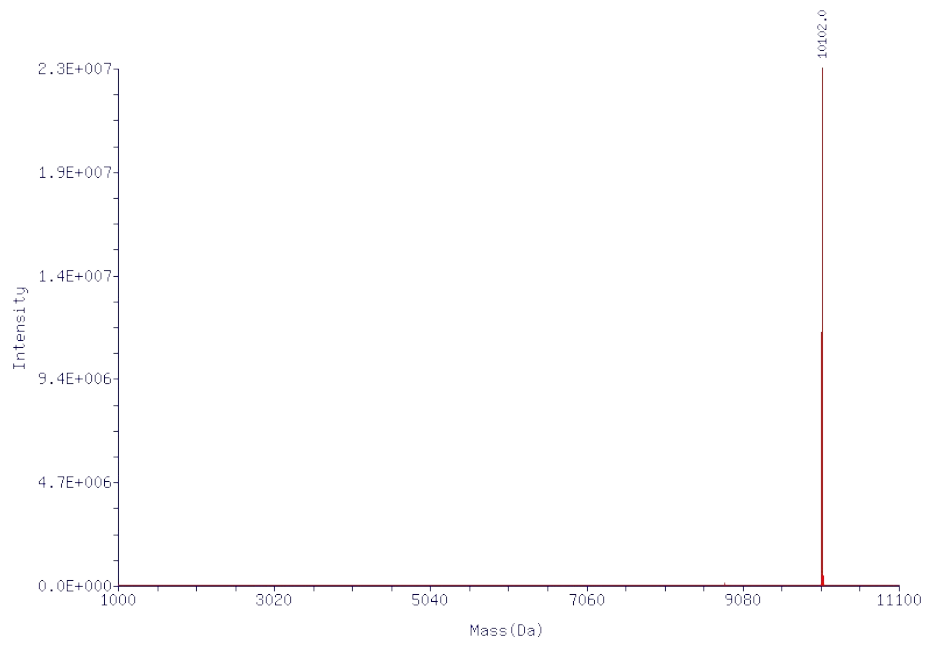

DZ-A11-6

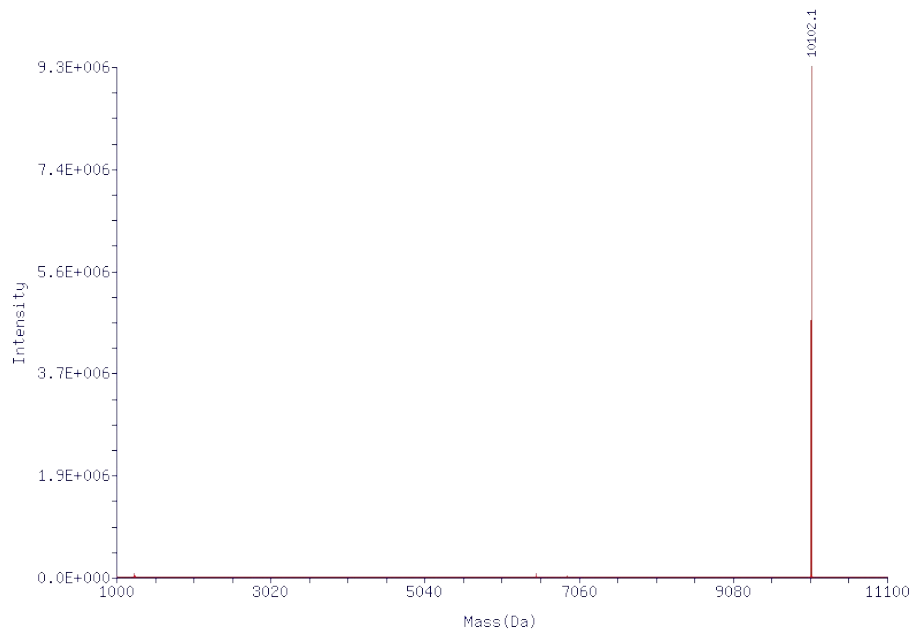

DZ-A12-6

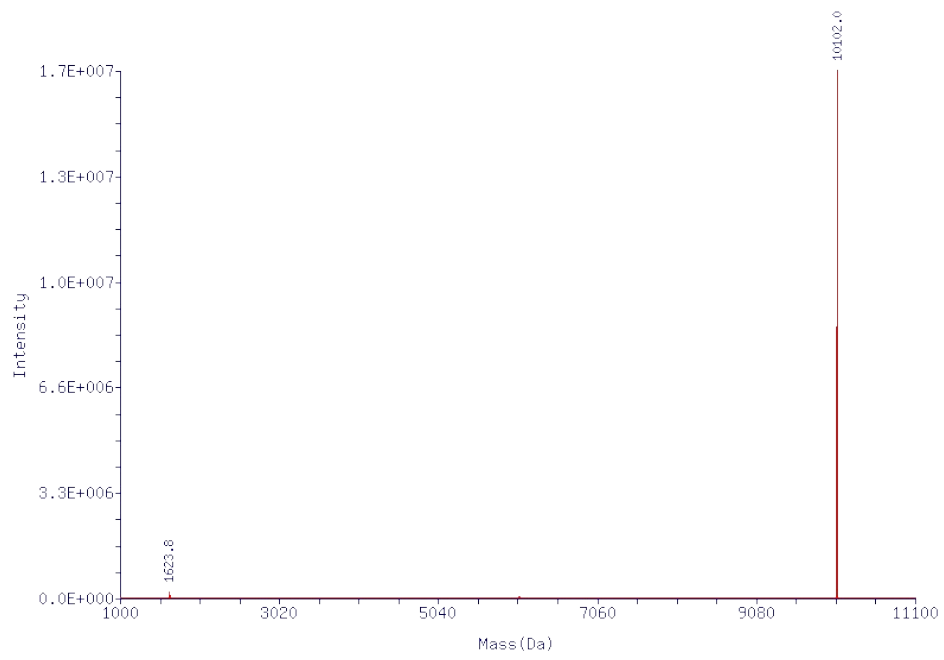

DZ-A15-

6

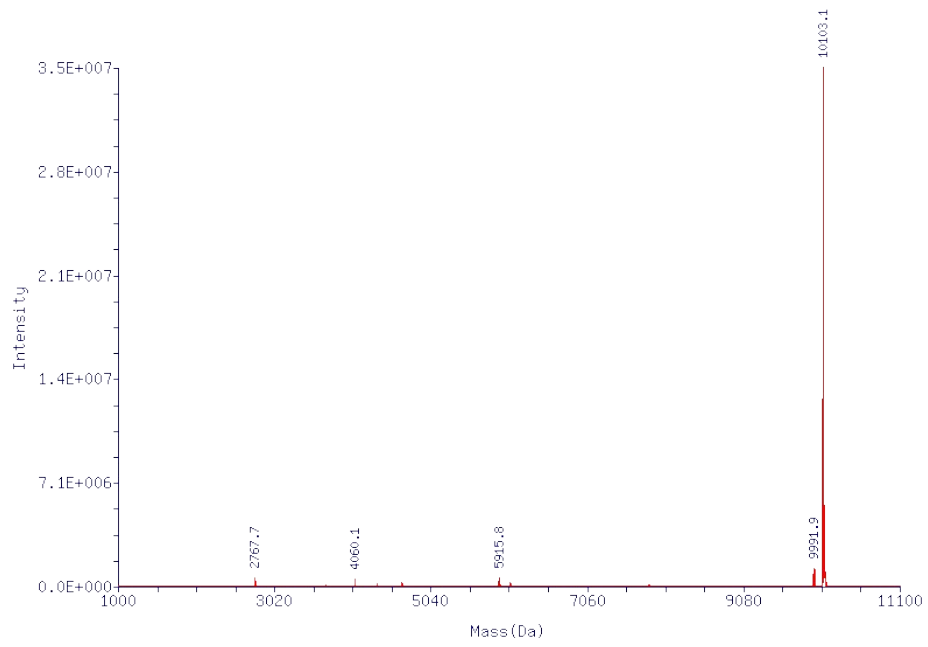

DZ-A0-6



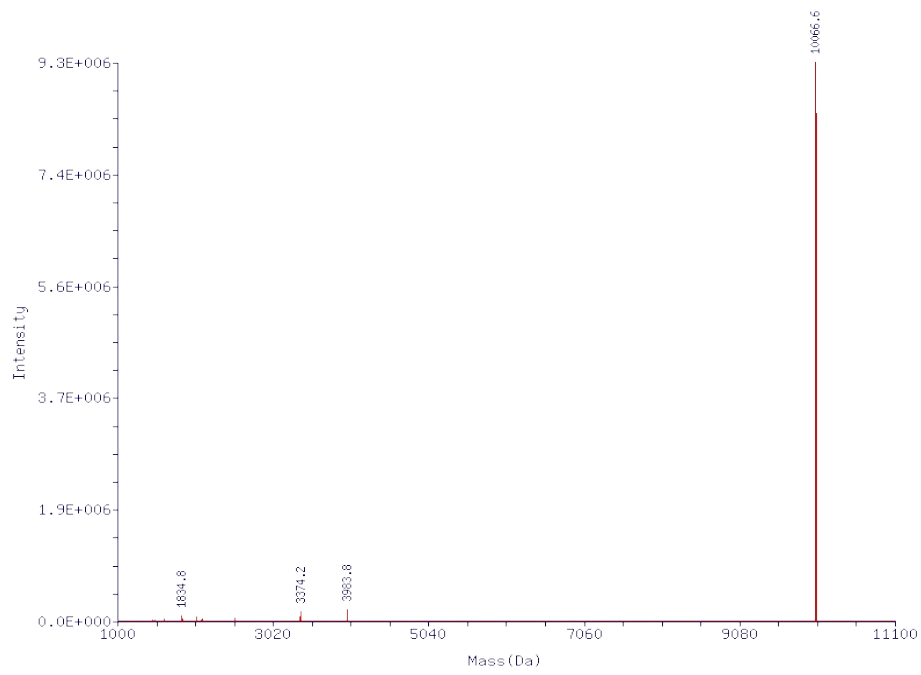

DZ-A5-7

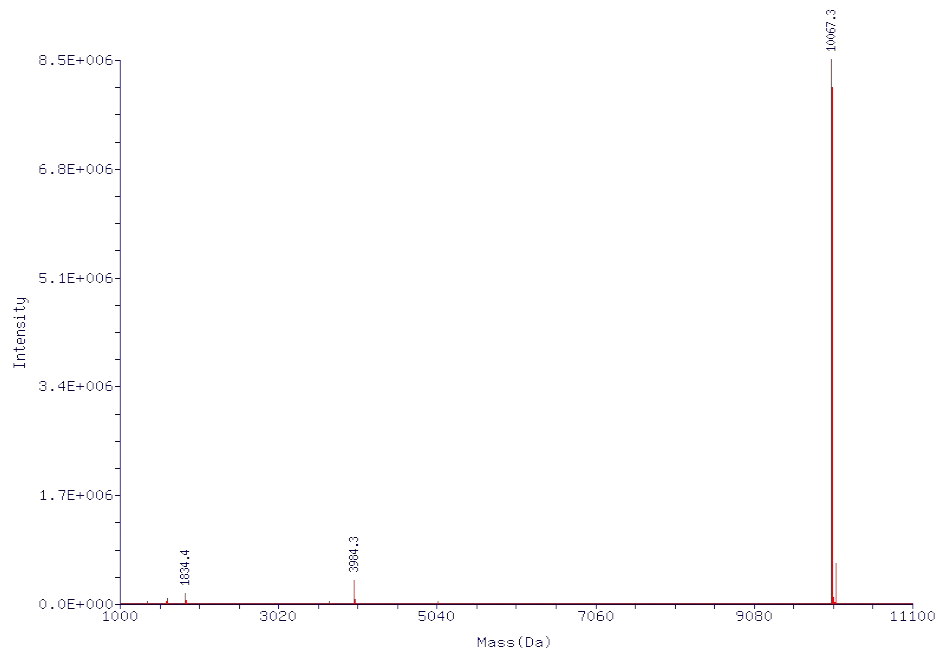

DZ-A9-7

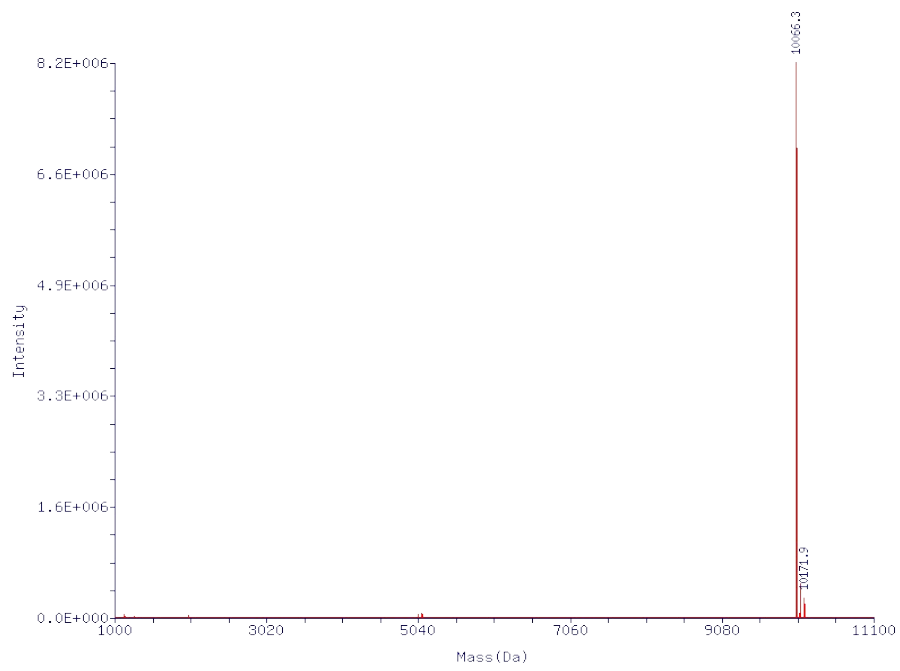

DZ-A11-7

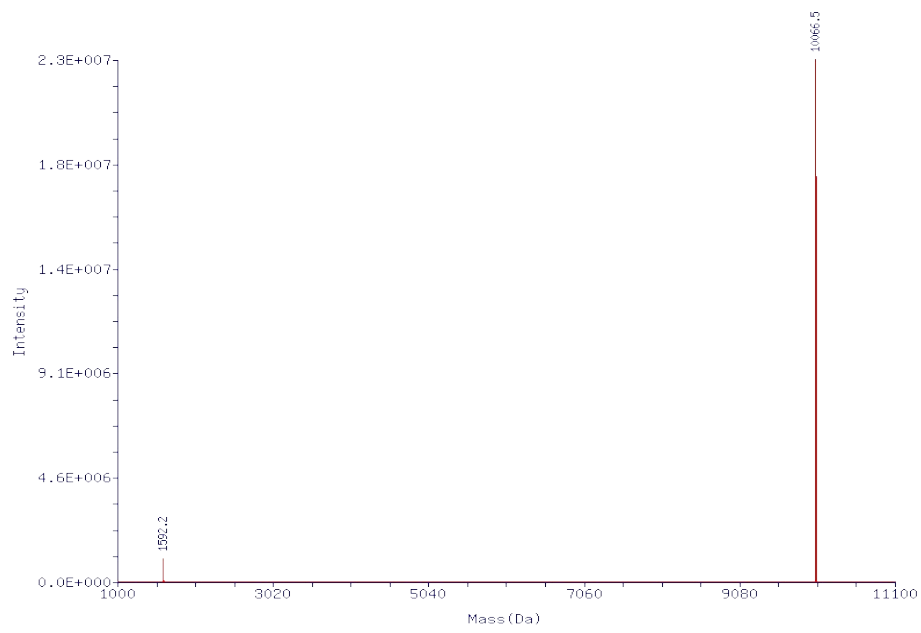

DZ-A12-7

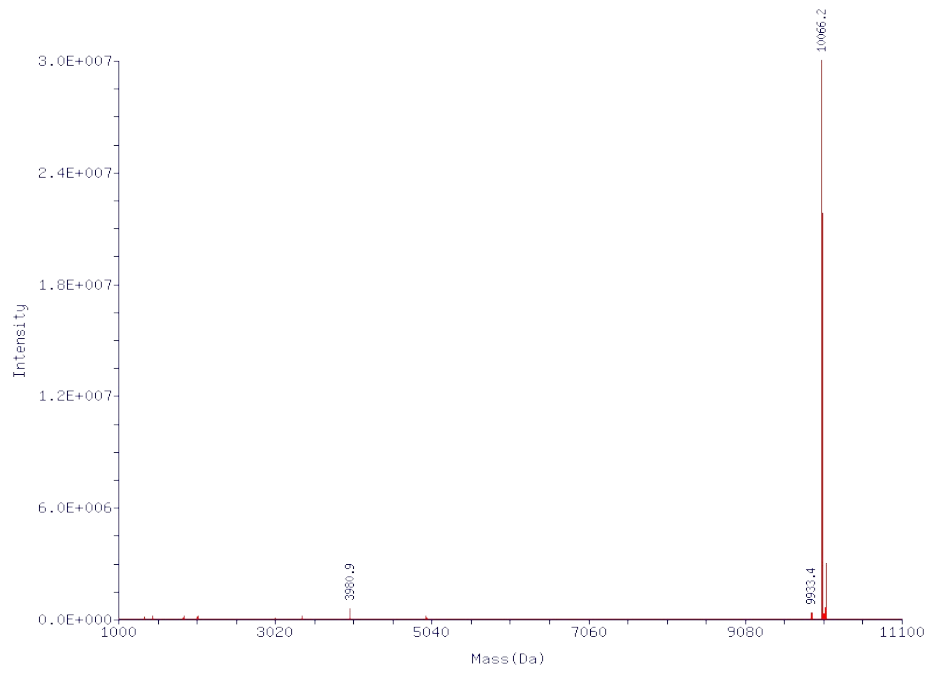

DZ-A15-7

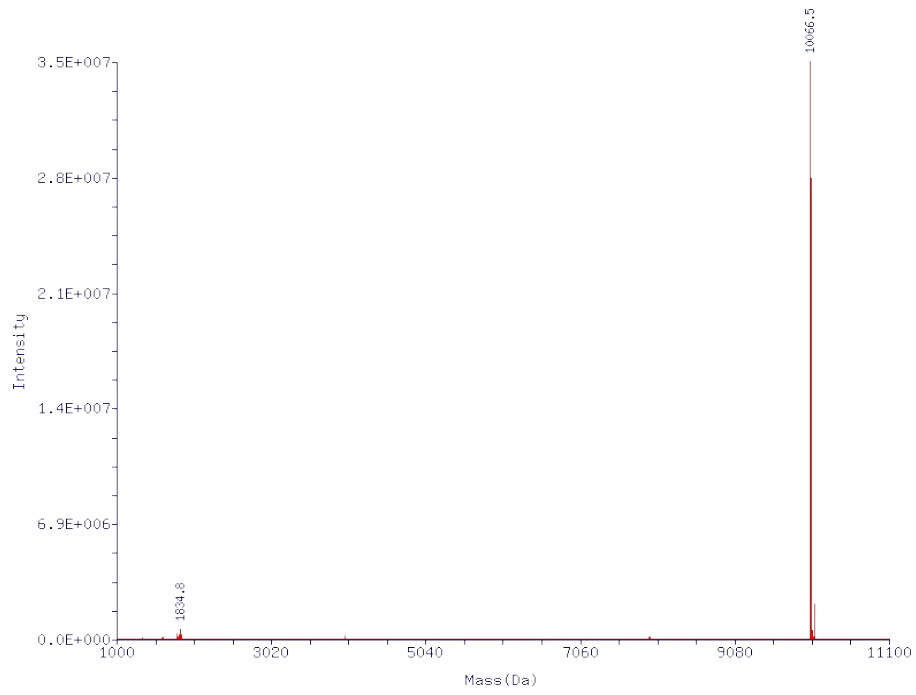

DZ-A0-7

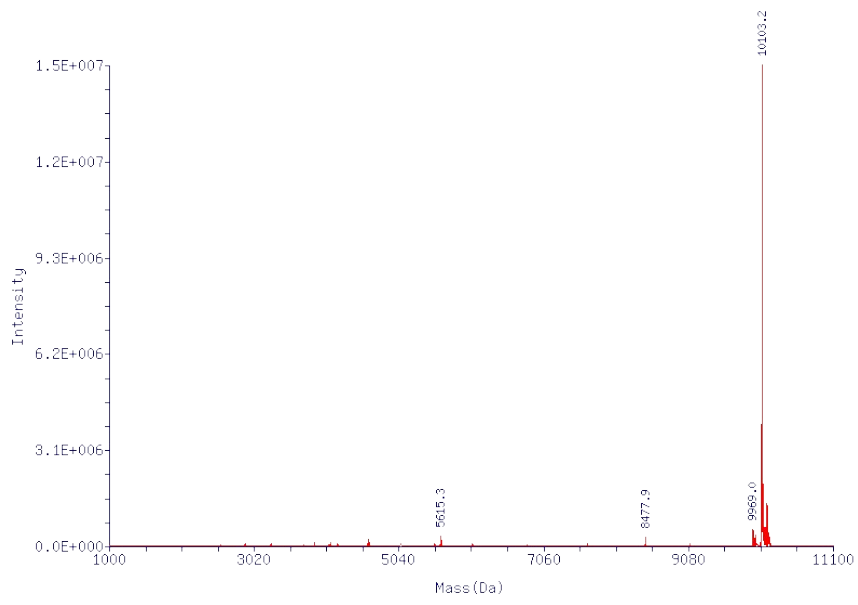

DZ-A5-8

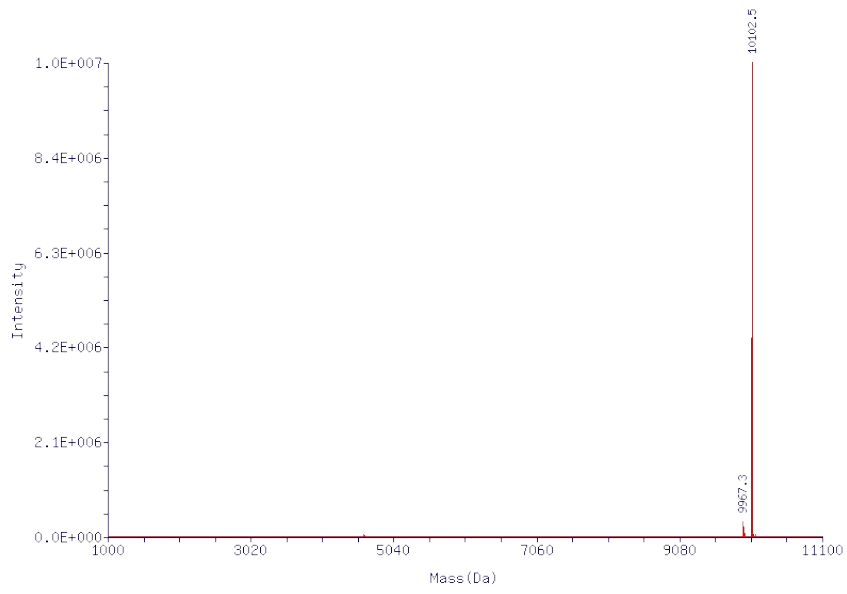

DZ-A9-8

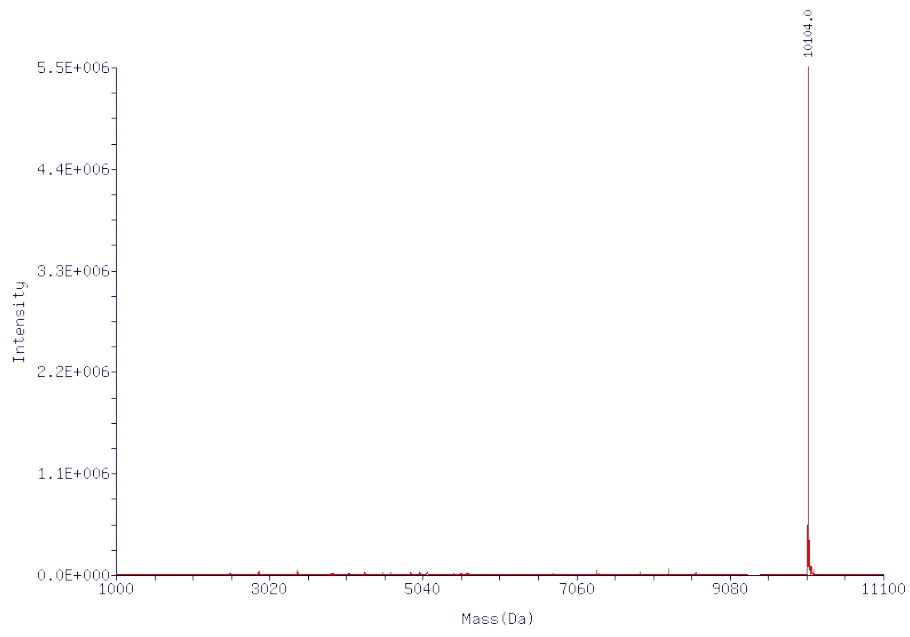

DZ-A11-8

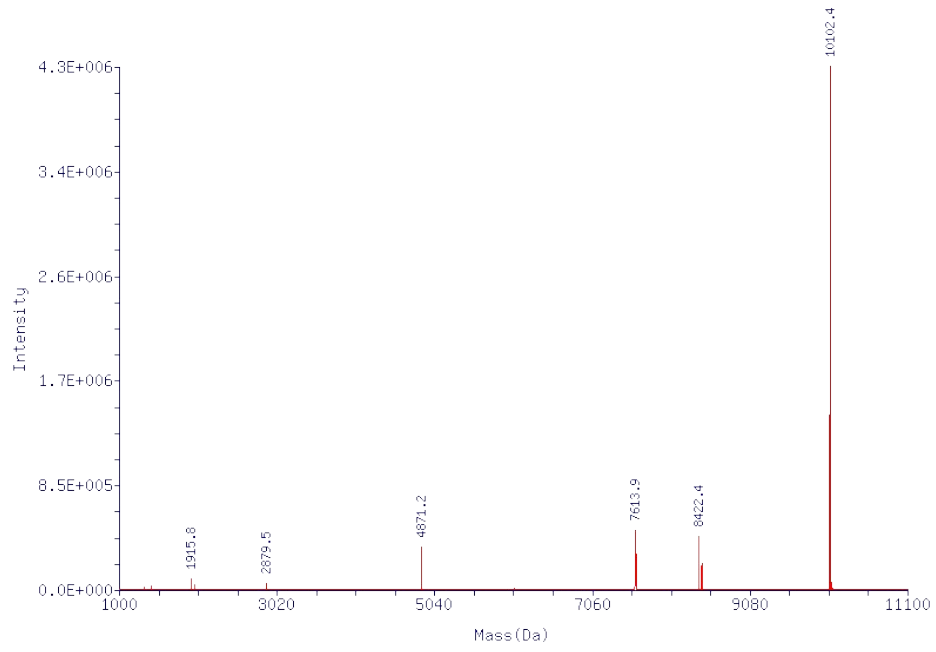

DZ-A12-

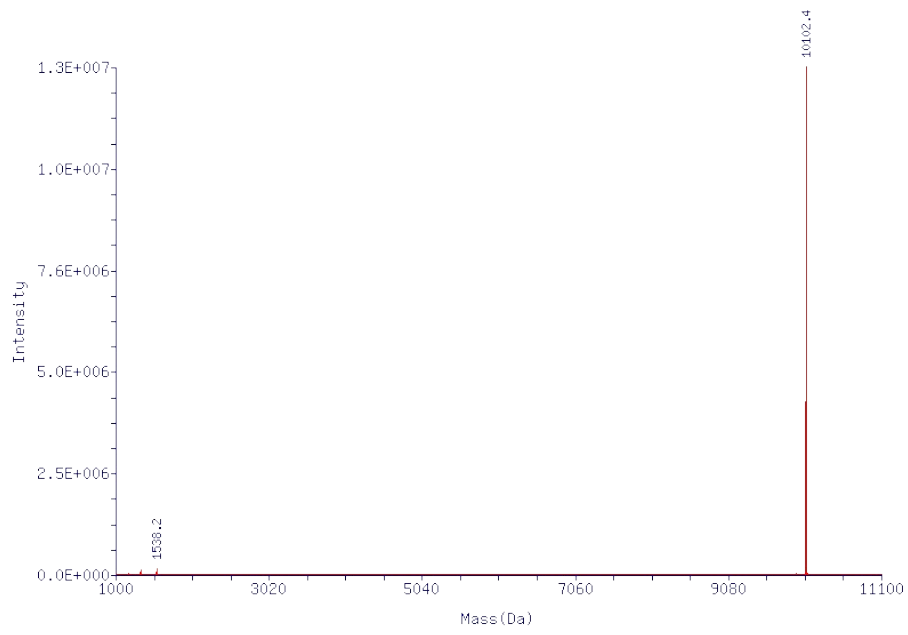

DZ-A15-8

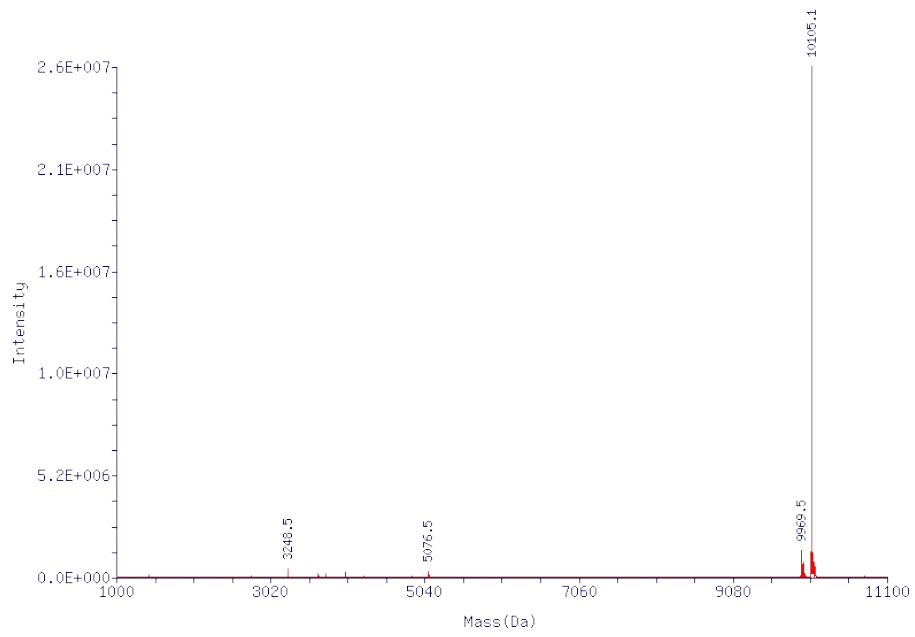

DZ-A0-8

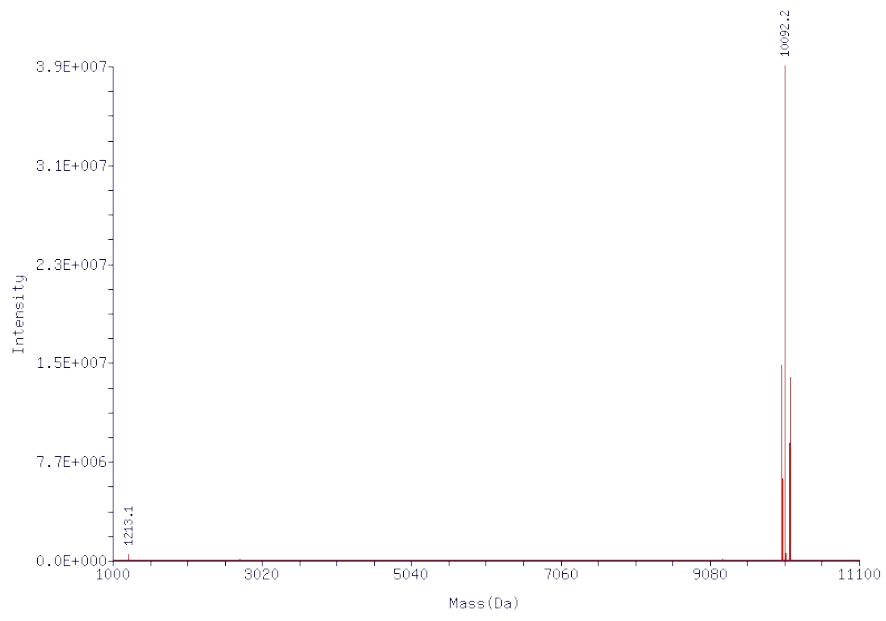

DZ-A5-9

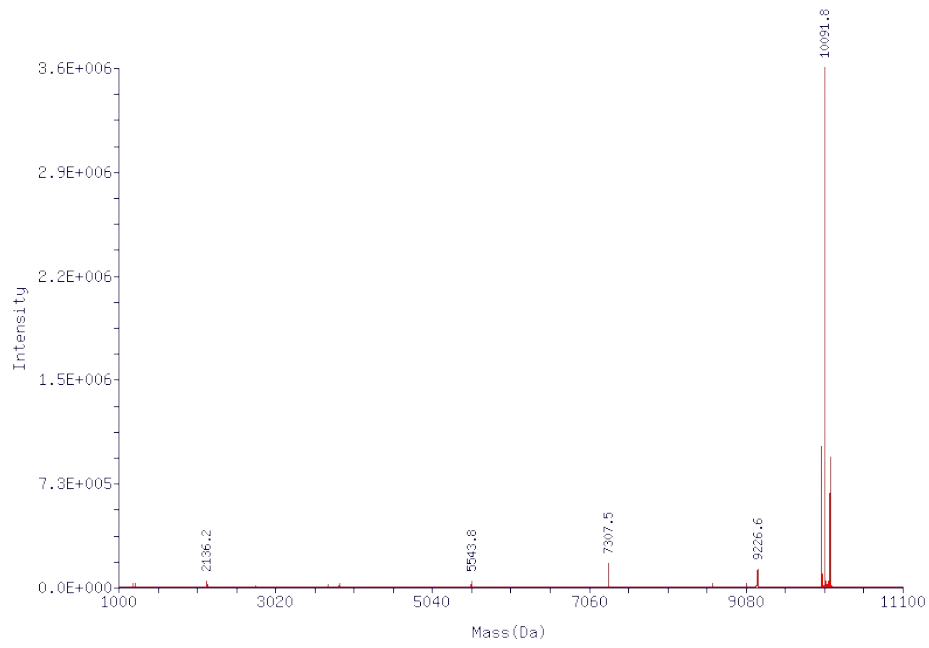

DZ-A9-9

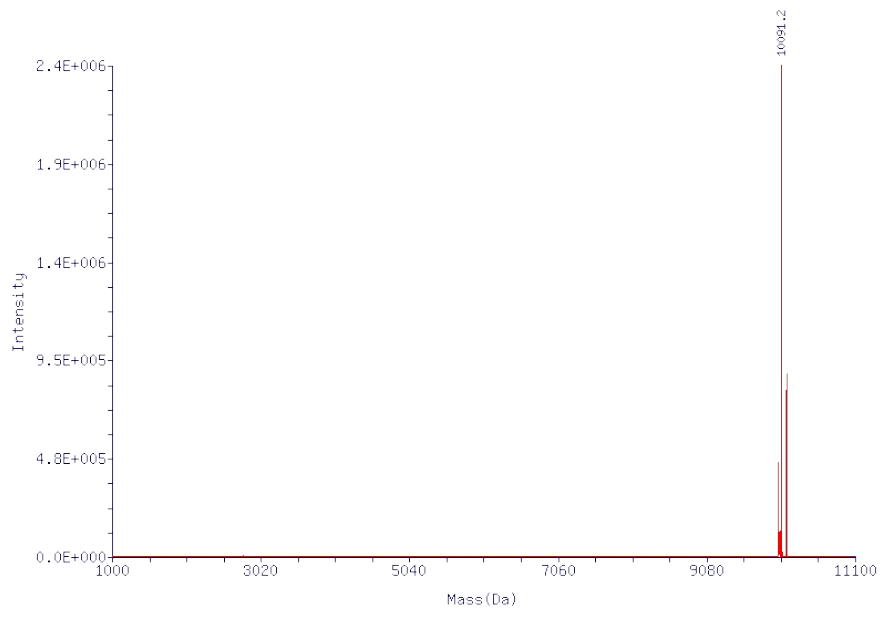

DZ-A11-9

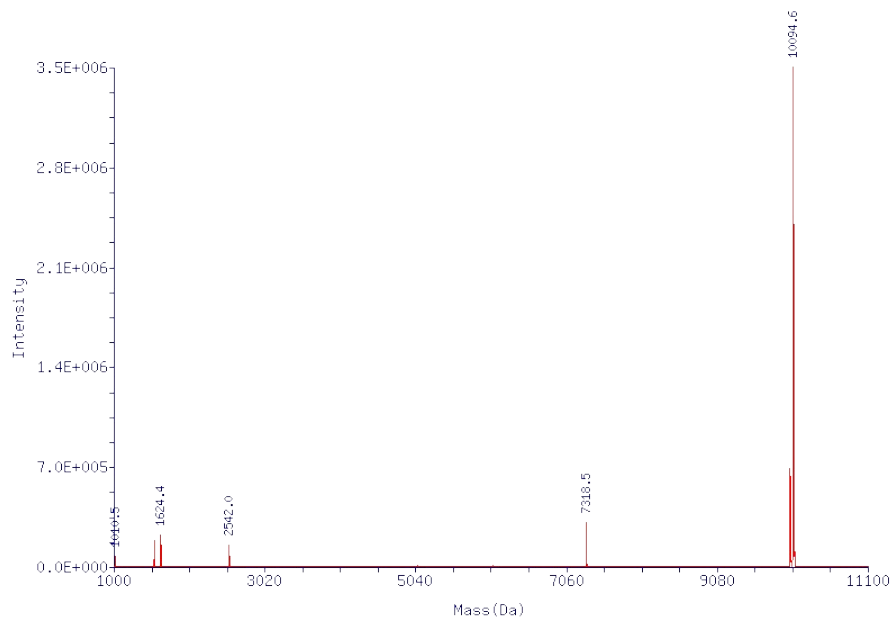

DZ-A12-9



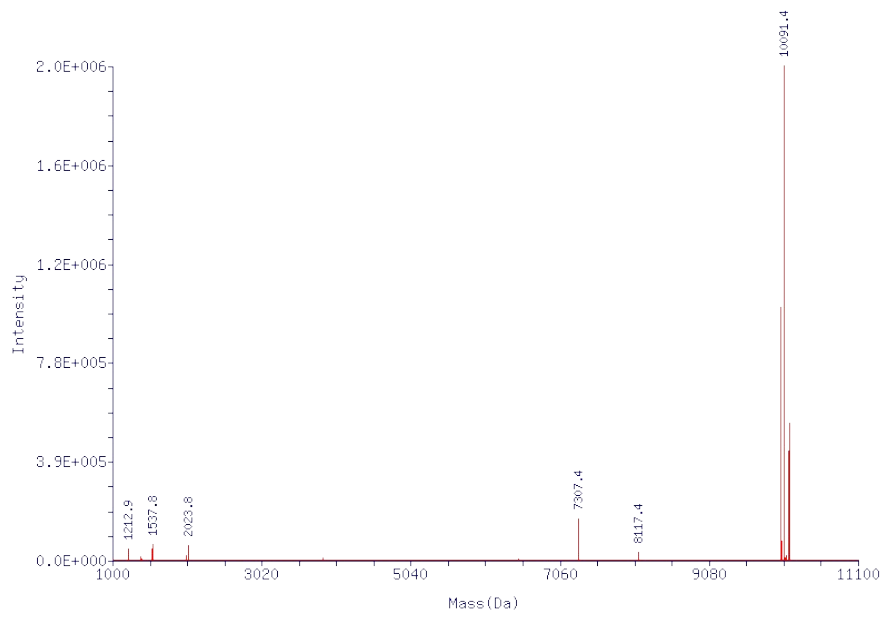

DZ-A15-9

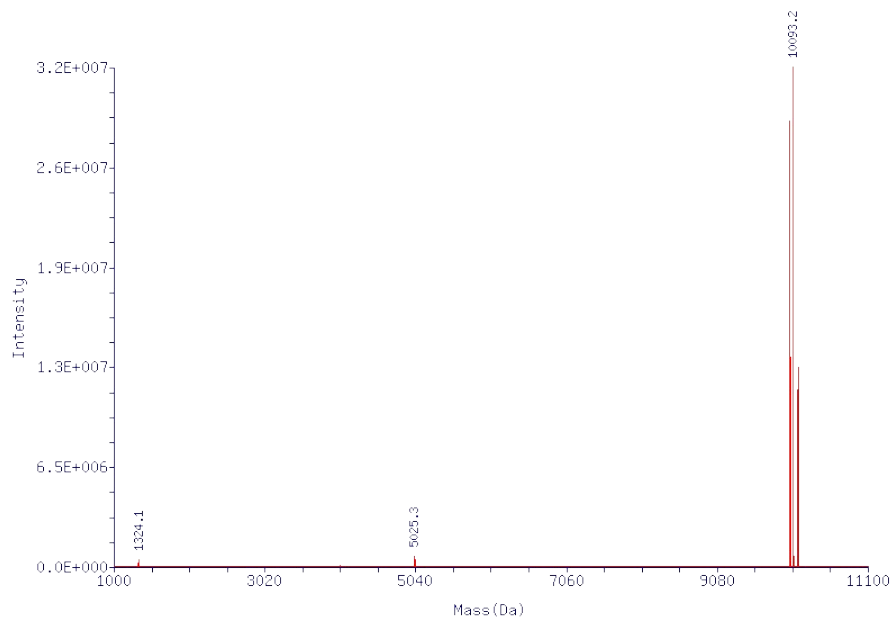

DZ-A0-9

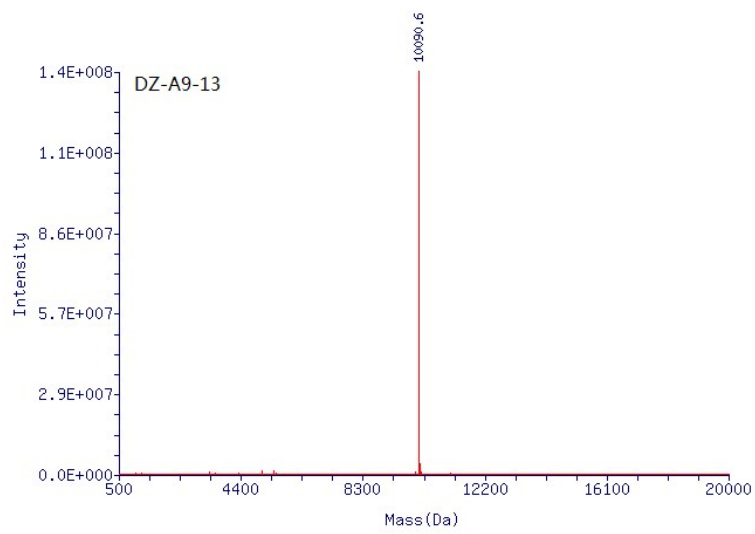

Fig. S2 MS spectra of DNAzymes with ESI-MS
